# Supplementary material for: A feather duster-like CoFe-LDH/CF composite with parallel array structure as an efficient water splitting electrocatalyst
Source: Royal Society of Chemistry journal article supplement (doi:10.1039/d5qm00718f), 2025-12-19
Supplement: d5qm00718f1.pdf [file d5qm00718f1.pdf]

## **Electronic Supplementary Information**

### **Feather duster-like CoFe-LDH/CF composite with parallel array structure as an efficient water splitting electrocatalyst**

Weiliang Xiong,<sup>ab</sup> Ting Li,<sup>b</sup> Xiang Li,<sup>\*a</sup> Peng Zhang,<sup>b</sup> Guosheng Shao,<sup>b</sup> Yige Zhao <sup>\*ab</sup>

<sup>a</sup> 713rd Research Institute of China Shipbuilding Industry Corporation, Zhengzhou, 450015, China

<sup>b</sup> State Center for International Cooperation on Designer Low-Carbon & Environmental Materials (CDLCEM), School of Materials Science and Engineering, Zhengzhou University, Zhengzhou 450001, China. E-mail: zhaoyg@zzu.edu.cn

## Experimental Section

### Physical Characterizations

The surface morphologies were examined using a ZEISS SIGMA 500 scanning electron microscope (SEM). Transmission electron microscopy (TEM) images were conducted using a FEI Talos F200S microscope. For chemical state analysis, we performed X-ray photoelectron spectroscopy (XPS) analysis using the AXIS Supra equipment, using the C1s peak with binding energy set at 284.8 electron volts as a reference for calibration. Characterization of the material composition and crystal structure was performed by X-ray diffraction (XRD) on a Rigaku Ultima IV system with Cu K $\alpha$  radiation. We used an ASAP 2020 analyzer to determine the specific surface area and pore size distribution through nitrogen adsorption/desorption measurements using the Brunauer-Emmett-Teller (BET) method.

### Electrochemical Measurements

A three-electrode system on a CHI 760E electrochemical workstation was used to perform the electrochemical testing under ambient conditions. The reference was a saturated calomel electrode (SCE), while the function of the counter electrode was performed by a graphite electrode. The preparation of the working electrodes involved a systematic polishing process using alumina suspensions with different grain sizes, starting at 1.0  $\mu\text{m}$ , then 0.5  $\mu\text{m}$ , and finally 0.05  $\mu\text{m}$ , to ensure the removal of any surface contaminants. The drop-casting of a catalyst ink onto a 3 mm diameter glassy carbon electrode was done with care, resulting in a catalyst loading of 0.35  $\text{mg cm}^{-2}$ . A mixture of 0.74 mL ethanol, 0.2 mL deionized water, and 0.06 mL of Nafion solution was used to make the ink itself, which was done by ultrasonically dispersing 5 mg of catalyst into this mixture. Calibration of all the potentials reported was done against the reversible hydrogen electrode (RHE) using the relationship specified in equation (1).

$$E_{\text{RHE}} = E_{\text{SCE}} + 0.0592 \times \text{pH} + 0.24 \text{ V} \quad (1)$$

Linear sweep voltammetry (LSV) was performed at a scan rate of 5  $\text{mV s}^{-1}$  with 80% iR compensation to assess oxygen evolution reaction (OER) activity between 1.0 and 2.0 V versus RHE, as well as hydrogen evolution reaction (HER) performance from 0

to -1.0 V versus RHE, all in a 1 M KOH solution saturated with oxygen. The double-layer capacitance ( $C_{dl}$ ) was estimated by measuring the electrochemically active surface area (ECSA) with cyclic voltammetry (CV) in a 1 M KOH solution saturated with nitrogen. The relationship between  $C_{dl}$  and ECSA can be described by the following equation:

$$ECSA = C_{dl} / C_s \quad (2)$$

where,  $C_s$  represent the capacitance of the flat electrode surface ( $C_s = 0.04 \text{ mF/cm}^2$ ). The potentials ranged from 0.1 to 0.2 V, and the scan rates varied from 20 to  $100 \text{ mVs}^{-1}$ . Electrochemical impedance spectroscopy (EIS) was carried out over a frequency range from 0.1 to  $10^6 \text{ Hz}$  with a perturbation amplitude of 5 mV. To gauge the catalyst durability, long-term stability tests were carried out via chronopotentiometry at  $10 \text{ mA cm}^{-2}$  over 30000 s. Measurements of 20 wt% Pt/C and  $\text{RuO}_2$  catalysts were conducted under identical conditions for comparison.

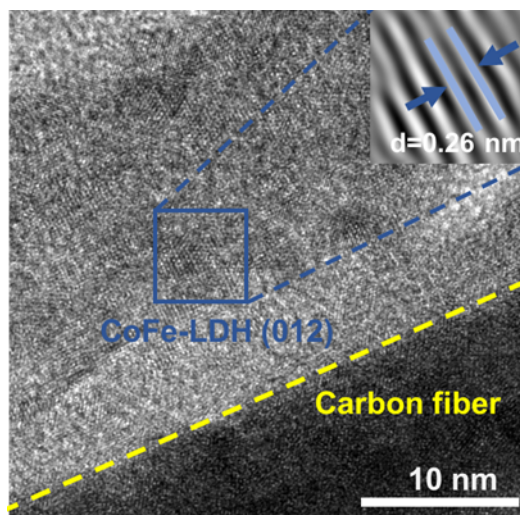

Figure S1. HRTEM image of p-CoFe-LDH/CF

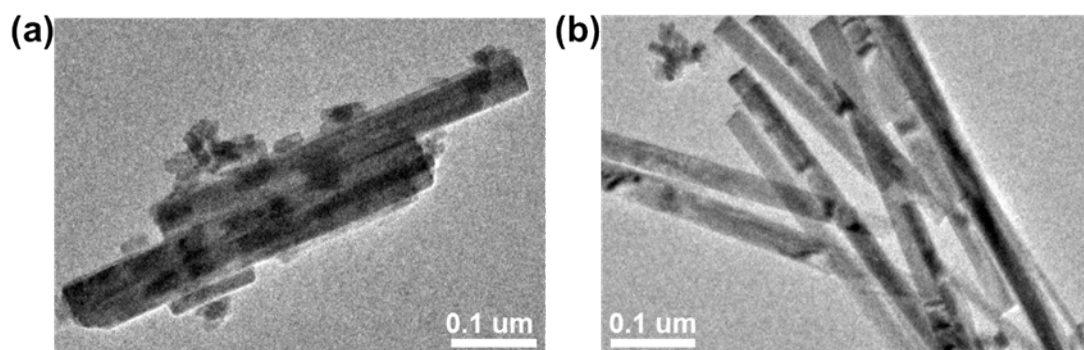

Figure S2. TEM image of (a) p-CoFe-LDH/CF, (b) CoFe-LDH/CF

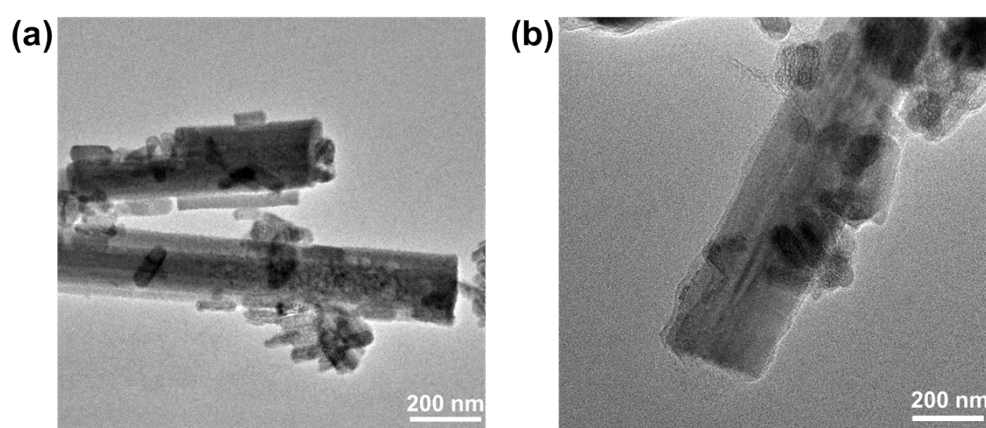

Figure S3. TEM image of (a) p-CoFe-LDH/CF before OER cycling stability test (b) p-CoFe-LDH/CF after OER cycling stability test

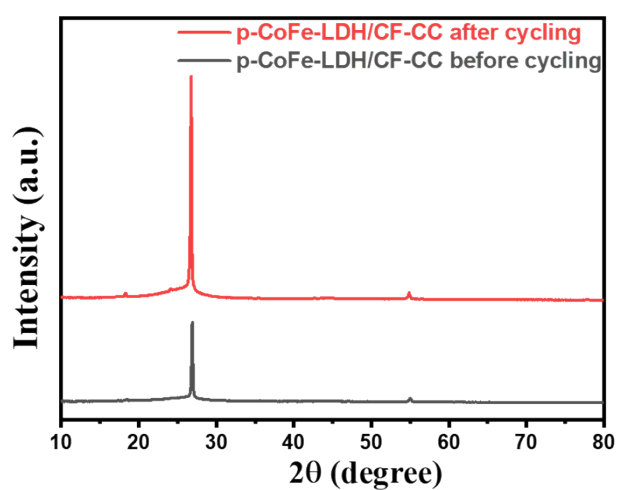

Figure S4. XRD patterns of p-CoFe-LDH/CF-CC before and after OER cyclability testing

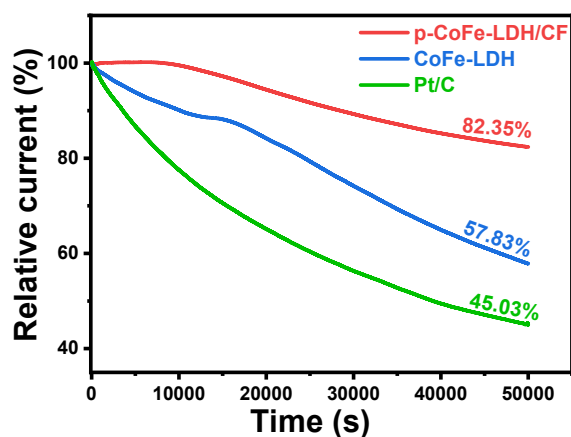

Figure S5. chronoamperometric curves conducted at 10 mA cm<sup>-2</sup> for HER

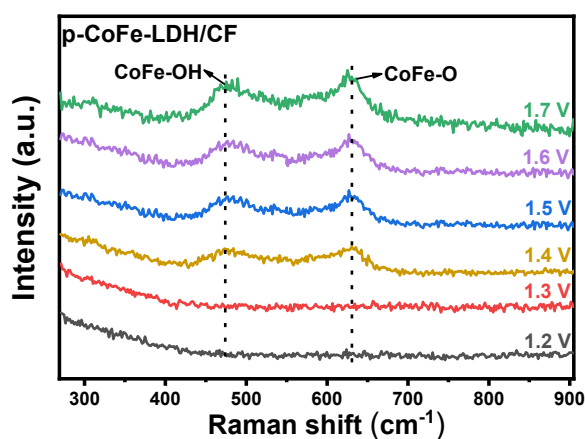

Figure S6. potential-dependent of in situ Raman spectra of p-CoFe-LDH/C

**Table S1.** Performance comparison of alkaline OER transition-metal-based catalyst in 1 M KOH at large current density.

| Catalyst                                                                | Overpotentials at 10 mA cm <sup>-2</sup> (mV) | Overpotentials at 100 mA cm <sup>-2</sup> (mV) | Reference                    |
|-------------------------------------------------------------------------|-----------------------------------------------|------------------------------------------------|------------------------------|
| p-CoFe-LDH/CF                                                           | 286                                           | 416                                            | This work                    |
| LiNiCo-OH                                                               | 340                                           | --                                             | 10.1021/acs.nanolett.5b00026 |
| Ultrathin CoMn-LDH                                                      | 350                                           | --                                             | 10.1021/ja5096733            |
| Co <sub>3</sub> O <sub>4</sub> @CoO SC                                  | 430                                           | --                                             | 10.1038/ncomms9106           |
| Echo-MWCNTs                                                             | 360                                           | --                                             | 10.1021/ja509879r            |
| Ni <sub>x</sub> Co <sub>3-x</sub> O <sub>4</sub> nanowire array/Ti foil | 370                                           | --                                             | 10.1002/adma.200903896       |
| Co <sub>x</sub> P/Cu foil                                               | 345                                           | --                                             | 10.1002/anie.201501616.      |
| Ni@N-HCGHF                                                              | 280                                           | 470                                            | 10.1002/adma.202003313       |
| Fe <sub>3</sub> C-Co/NC                                                 | 371                                           | 450                                            | 10.1002/adfm.201901949       |
